# Supplementary material for: Immunometabolism Modulation by Extracts from Pistachio Stalks Formulated in Phospholipid Vesicles
Source: MDPI journal article supplement (doi:10.3390/pharmaceutics15051540), 2023-05-19
Supplement: s1 [file s1]

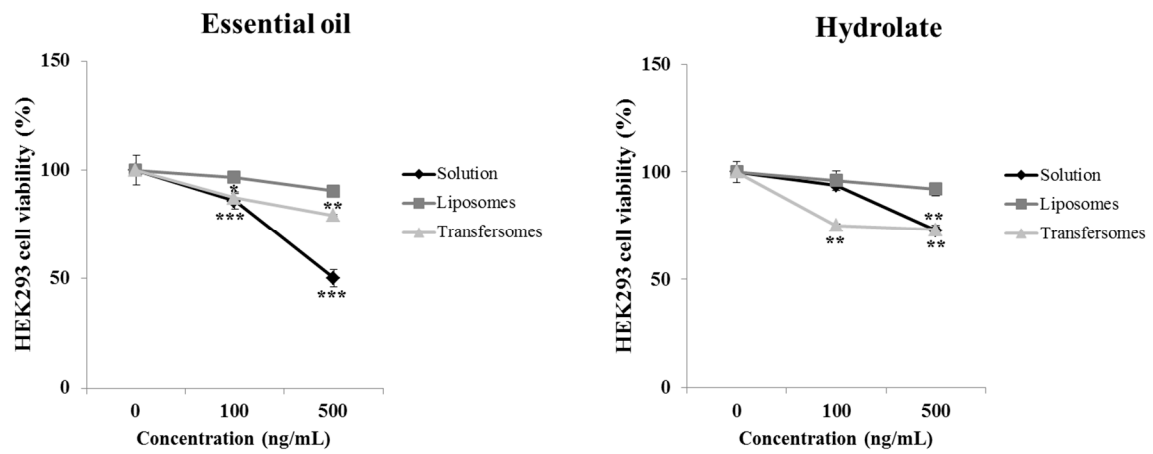

Figure S1. HEK293 viability (\*  $p < 0.05$ , \*\*  $p < 0.01$ , \*\*\*  $p < 0.001$ ).

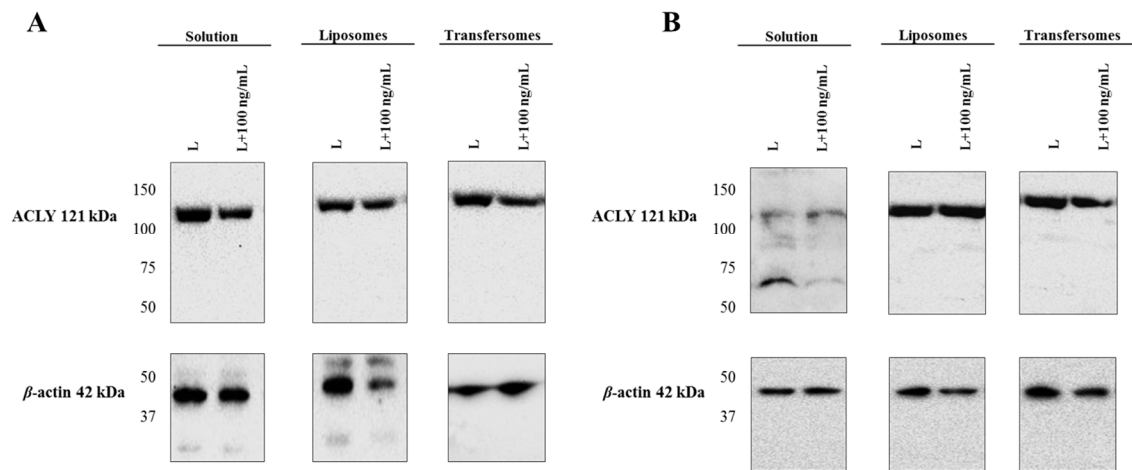

Figure S2. Full picture of ACLY western blotting for *P. vera* essential oil (A) and hydrolate (B).
